# Supplementary material for: Sarcopenia and Treatment Toxicity in Older Adults Undergoing Chemoradiation for Head and Neck Cancer: Identifying Factors to Predict Frailty
Source: MDPI journal article supplement (doi:10.3390/cancers14092094), 2022-04-22
Supplement: s1 [file s1]

## Supplementary Material

**Table S1.** Univariate predictors of chemotherapy and radiation toxicity breaks. Bolded variables represent p-value < 0.05.

|                         | Chemotherapy<br>Toxicity |                 | Any Radiation<br>Break  |                 | Prolonged<br>Radiation<br>Breaks |                 |
|-------------------------|--------------------------|-----------------|-------------------------|-----------------|----------------------------------|-----------------|
|                         | Odds Ratio (95% CI)      | P-value         | Odds Ratio (95%<br>CI)  | P-<br>value     | Odds Ratio (95%<br>CI)           | P-value         |
| Age ≥70                 | <b>2.57 (1.38-4.78)</b>  | <b>&lt;0.01</b> | <b>2.39 (1.28-4.44)</b> | <b>&lt;0.01</b> | <b>4.02 (1.86-8.73)</b>          | <b>&lt;0.01</b> |
| Gender                  |                          | 0.36            |                         | 0.19            |                                  | 0.36            |
| Male                    | Ref                      |                 | Ref                     |                 | Ref                              |                 |
| Female                  | 1.33 (0.72-2.50)         |                 | 1.51 (0.81-2.83)        |                 | 1.50 (0.63-3.56)                 |                 |
| Race                    |                          | 0.14            |                         | 0.64            |                                  | 0.14            |
| White                   | Ref                      |                 | Ref                     |                 | Ref                              |                 |
| Non-white               | 0.49 (0.19-1.25)         |                 | 0.82 (0.35-1.93)        |                 | 0.12 (0.01-2.01)                 |                 |
| ECOG Performance status |                          | 0.32            |                         | <b>0.04</b>     |                                  | 0.14            |
| 0-1                     | 0.67 (0.31-1.47)         |                 | <b>0.44 (0.20-0.96)</b> |                 | 0.48 (0.18-1.28)                 |                 |
| ≥2                      | Ref                      |                 | <b>Ref</b>              |                 | Ref                              |                 |
| Stage                   |                          | 0.81            |                         | 0.38            |                                  | 0.29            |
| III                     | Ref                      |                 | Ref                     |                 | Ref                              |                 |
| IV                      | 0.93 (0.52-1.68)         |                 | 1.32 (0.71-2.45)        |                 | 1.71 (0.63-4.65)                 |                 |
| Subsite                 |                          | 0.32            |                         | 0.84            |                                  | 0.41            |
| Larynx/Hypopharynx      | Ref                      |                 | Ref                     |                 | Ref                              |                 |
| Oropharynx              | 0.85 (0.47-1.53)         |                 | 0.87 (0.47-1.60)        |                 | 0.66 (0.28-1.55)                 |                 |
| Other                   | 0.50 (0.20-1.24)         |                 | 1.05 (0.44-2.48)        |                 | 1.20 (0.39-3.70)                 |                 |
| Smoking Status          |                          | <b>&lt;0.01</b> |                         | 0.45            |                                  | 0.36            |
| Never                   | <b>Ref</b>               |                 | Ref                     |                 | Ref                              |                 |
| Former                  | <b>0.67 (0.37-1.23)</b>  |                 | 0.24 (0.68-2.27)        |                 | 0.54 (0.23-1.25)                 |                 |
| Current                 | <b>2.24 (1.14-4.40)</b>  |                 | 1.56 (0.78-3.13)        |                 | 0.76 (0.29-1.97)                 |                 |
| P16-positive oropharynx |                          | 0.77            |                         | 0.58            |                                  | 0.21            |
| No                      | Ref                      |                 | Ref                     |                 | Ref                              |                 |
| Yes                     | 0.93 (0.57-1.53)         |                 | 0.87 (0.53-1.43)        |                 | 0.62 (0.28-1.31)                 |                 |
| Induction chemotherapy  |                          | 0.67            |                         | 0.28            |                                  | .81             |
| Yes                     | Ref                      |                 | Ref                     |                 | Ref                              |                 |
| No                      | 1.22 (0.48-3.08)         |                 | 1.75 (0.63-4.81)        |                 | 1.18 (0.29-4.75)                 |                 |
| Concurrent Cisplatin    |                          | 0.55            |                         | 0.70            |                                  | 0.35            |
| Yes                     | Ref                      |                 | Ref                     |                 | Ref                              |                 |
| No                      | 0.85 (0.49-1.47)         |                 | 0.89 (0.52-1.56)        |                 | 1.43 (0.67-3.08)                 |                 |

|                       |                        |                 |                         |             |                         |                 |
|-----------------------|------------------------|-----------------|-------------------------|-------------|-------------------------|-----------------|
| Post-operative        |                        | 0.49            |                         | 0.27        |                         | 0.34            |
| Yes                   | Ref                    |                 | Ref                     |             | Ref                     |                 |
| No                    | 0.81 (0.44-1.47)       |                 | 0.71 (0.39-1.30)        |             | 0.67 (0.29-1.54)        |                 |
| BMI                   |                        | 0.28            |                         | 0.57        |                         | 0.030           |
| <30                   | 1.35 (0.79-2.31)       |                 | 1.17 (0.68-2.0)         |             | 2.98 (1.1-8.0)          |                 |
| ≥30                   | Ref                    |                 | Ref                     |             | Ref                     |                 |
| Low SMI               |                        | <b>&lt;0.01</b> |                         | 0.41        |                         | <b>&lt;0.01</b> |
| Yes                   | <b>2.2 (1.28-3.75)</b> |                 | 1.25 (0.74-2.11)        |             | <b>3.72 (1.48-9.36)</b> |                 |
| No                    | <b>Ref</b>             |                 | Ref                     |             | <b>Ref</b>              |                 |
| Low SMD               |                        | 0.58            |                         | 0.06        |                         | 0.17            |
| Yes                   | Ref                    |                 | Ref                     |             | Ref                     |                 |
| No                    | 0.86 (0.52-1.45)       |                 | 0.61 (0.36-1.03)        |             | 0.60 (0.28-1.25)        |                 |
| SMG                   |                        | 0.12            |                         | <b>0.01</b> |                         | <b>0.018</b>    |
| High                  | Ref                    |                 | <b>Ref</b>              |             | <b>Ref</b>              |                 |
| Low                   | 1.50 (0.89-2.49)       |                 | <b>1.94 (1.15-3.29)</b> |             | <b>2.59 (1.18-5.69)</b> |                 |
| NRL Ratio             |                        | 0.06            |                         | 0.23        |                         | 0.36            |
| ≥ 3                   | Ref                    |                 | Ref                     |             | Ref                     |                 |
| < 3                   | 0.62 (0.37-1.03)       |                 | 0.73 (0.44-1.22)        |             | 0.71 (0.33-1.50)        |                 |
| Pre-treatment albumin |                        | 0.37            |                         | 0.12        |                         | <b>0.023</b>    |
| > 3.5 g/dL            | Ref                    |                 | Ref                     |             | <b>Ref</b>              |                 |
| ≤ 3.5 g/dL            | 1.40 (0.66-2.95)       |                 | 1.81 (0.86-3.81)        |             | <b>2.84 (1.15-6.99)</b> |                 |
